# Supplementary material
Source: PubMed Central journal article supplement (PMC2900895)

## Supplemental Figures

Figure legend:

Figure S1: A) AHNAK is enhanced in skeletal muscle of calpainopathy patients compared to skeletal muscle of MH and OPDM patients. Single sections of skeletal muscle of one calpainopathy patient, one healthy control, one Malignant Hyperthermia patient, and one Oculopharyngeal Muscular Dystrophy patient were blocked for 2 h in 4% skimmed milk (Marvel) in PBS and incubated with an antiDystrophin/KIS mixture. Only in the calpainopathy tissue increased AHNAK is found. B) Single sections were dissolved in 35  $\mu$ l sample buffer, loaded on 7% gel and after blotting membrane was stained with KIS antibody. The arrow points out the presence of endogenous AHNAK. Ponceau S and Dystrophin staining were used as a loading control.

Figures:

Fig. S1a

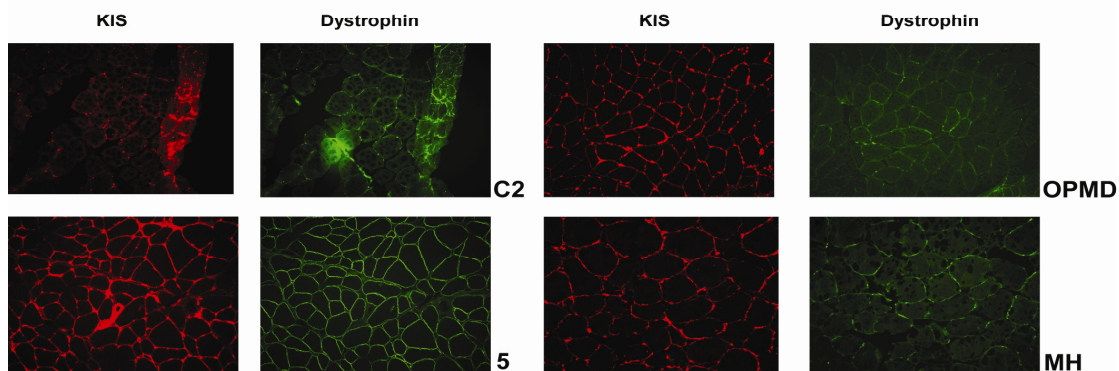

FigS1b

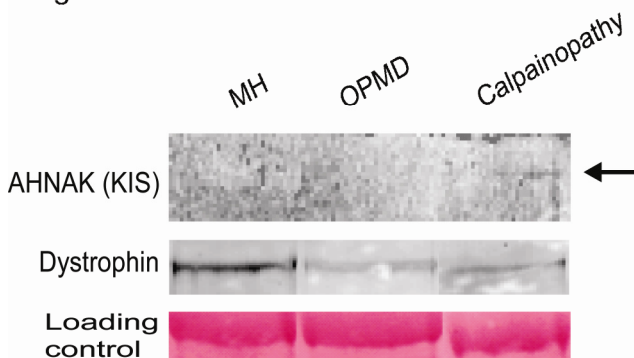

Supplement: ddn081_1.pdf [file ddn081_1.pdf]
